# Supplementary material
Source: publisher figshare collection journal article supplement (https://frontiersin.figshare.com/ndownloader/files/27567716)
Supplement: Supplementary file 1 [file 27567716]

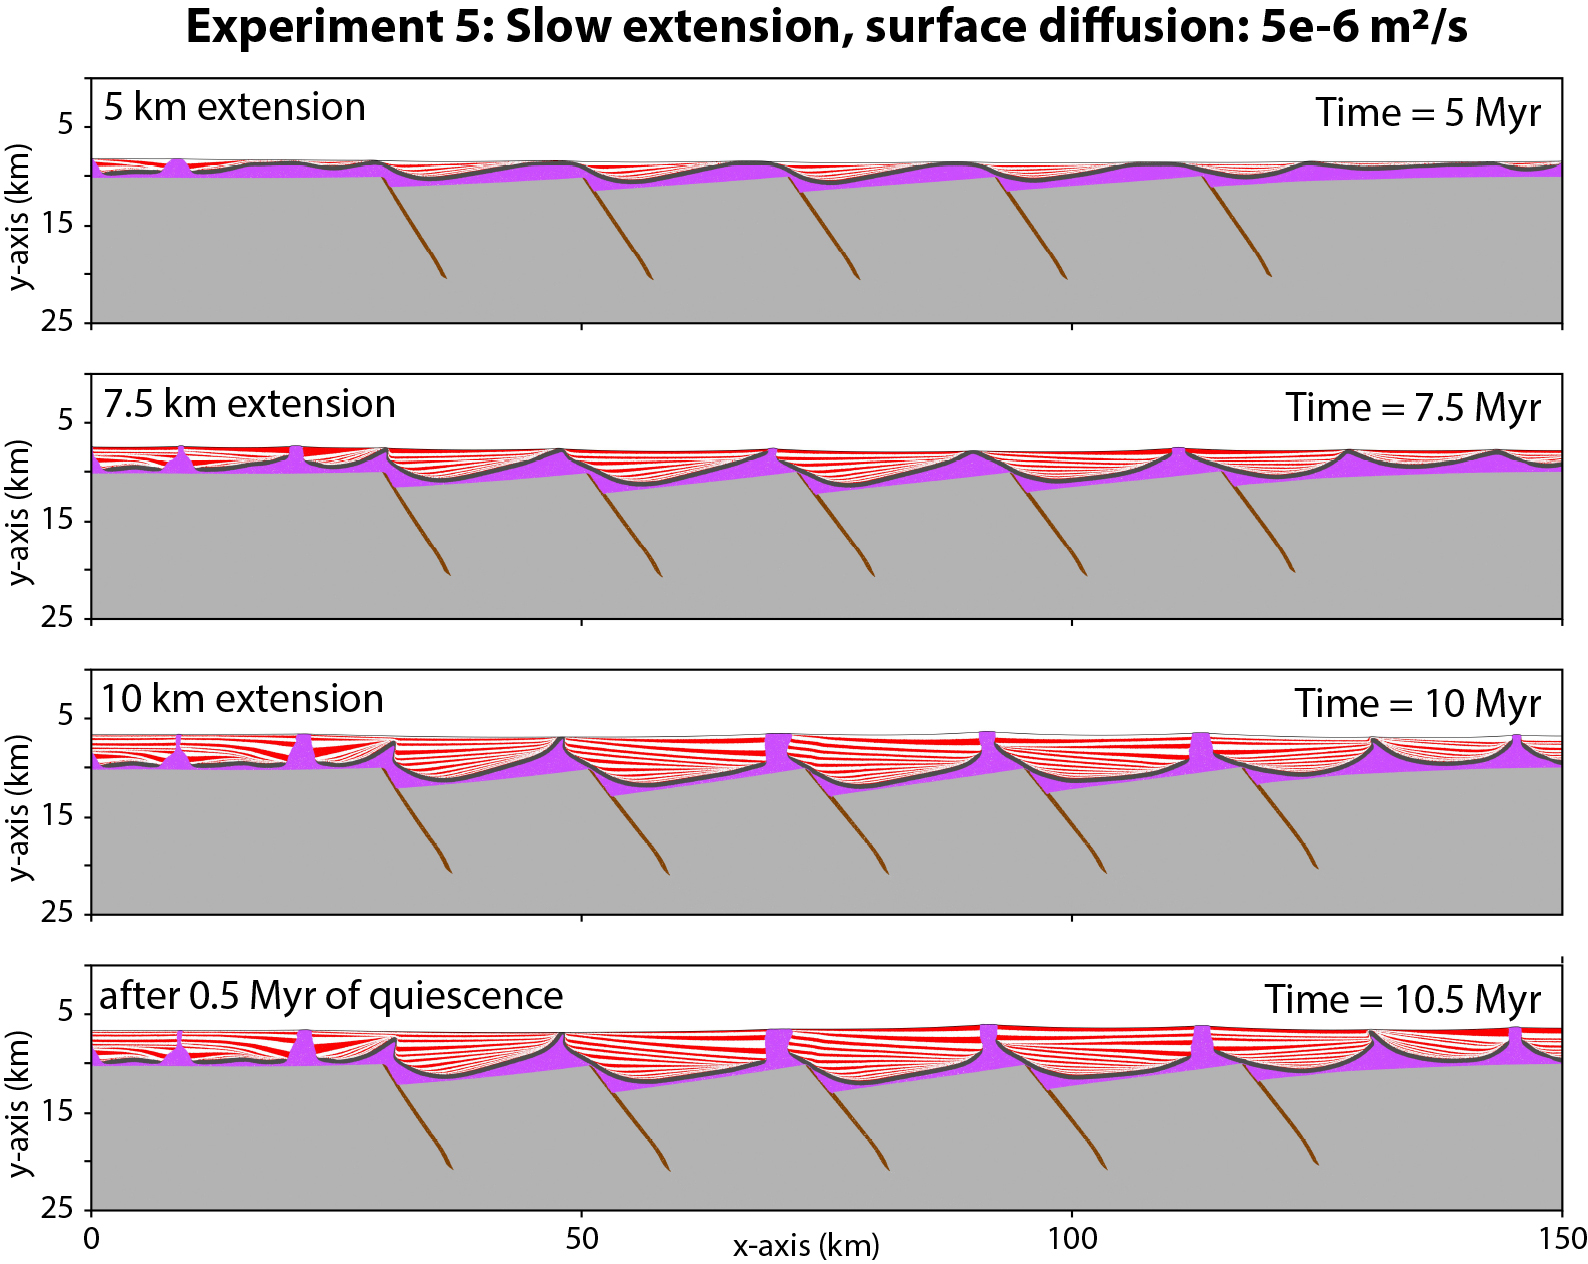


**Figure S1.** Marker composition of thick-skinned extension and tectonic quiescence with a linear viscous salt rheology, a slow extension rate = 1 mm/yr, and a surface diffusion coefficient of 5·10-6 m2/s. See Fig. 2 for color code.


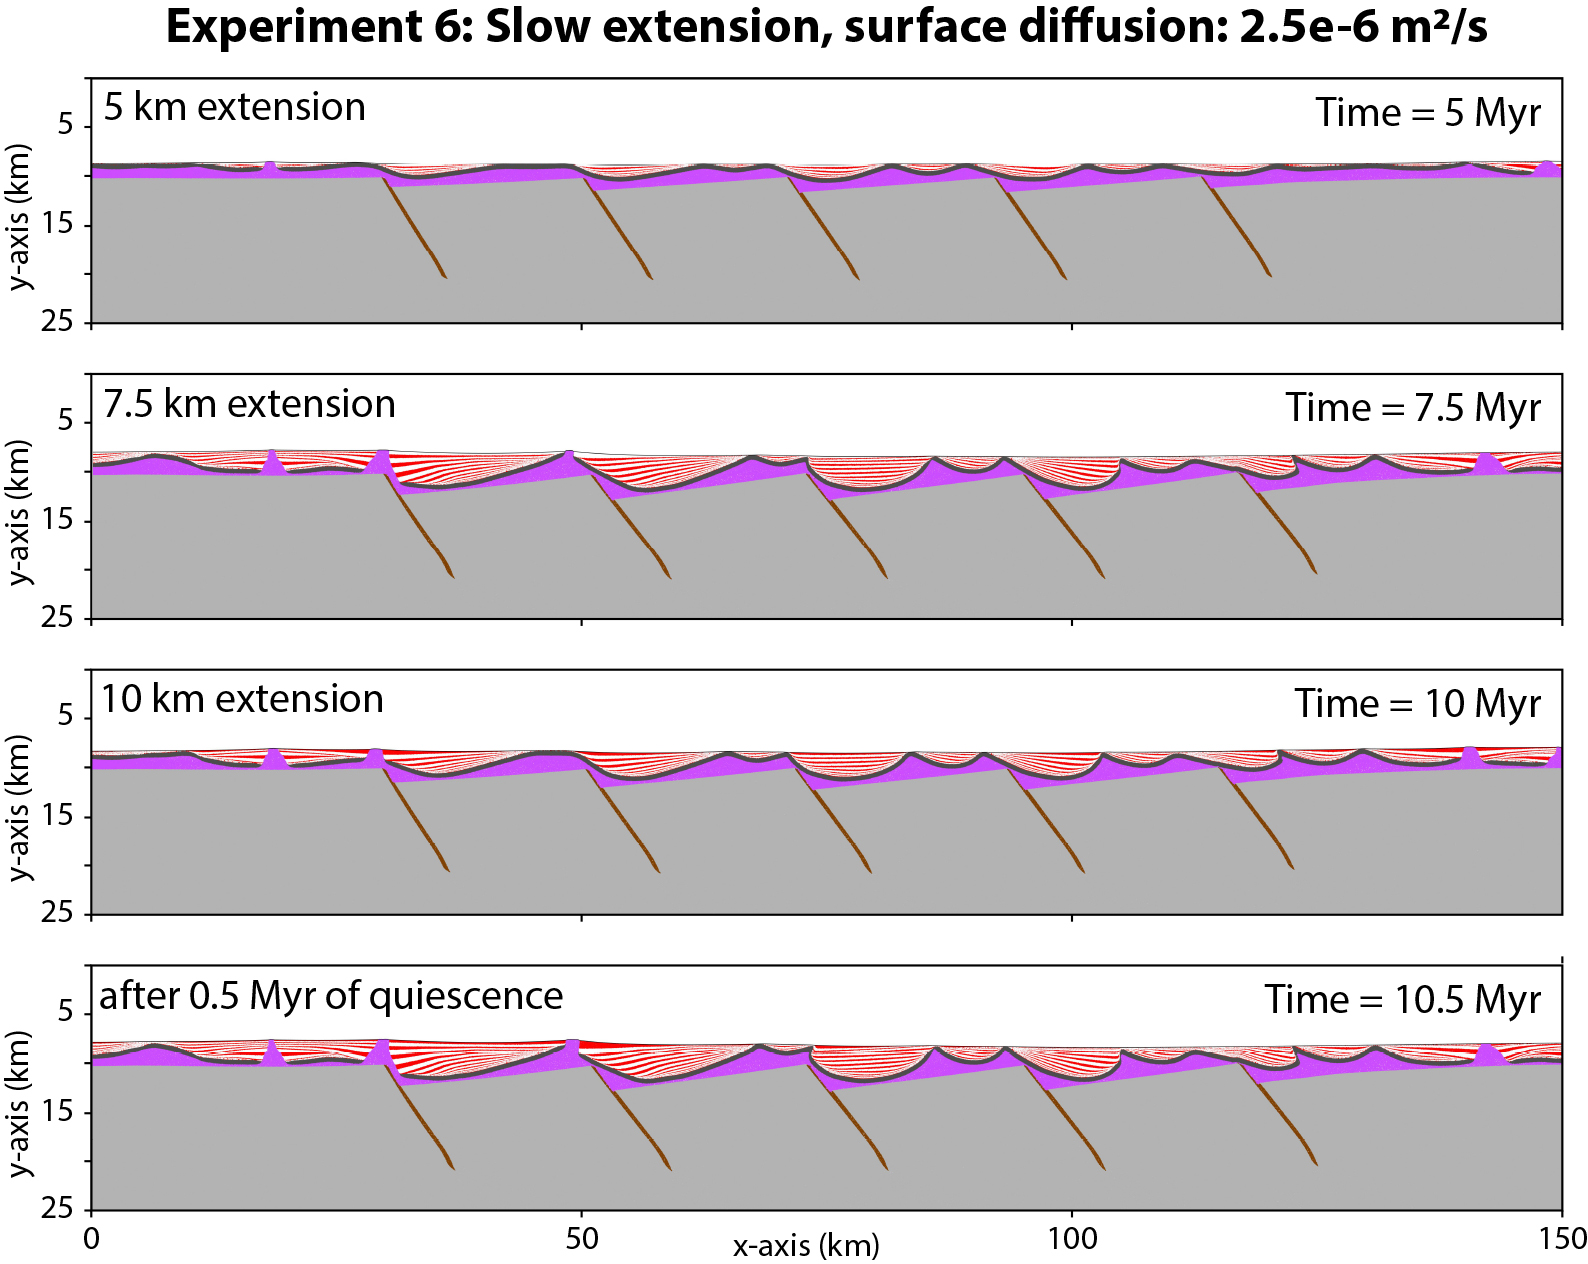


**Figure S2.** Marker composition of thick-skinned extension and tectonic quiescence with a linear viscous salt rheology, a slow extension rate = 1 mm/yr, and a surface diffusion coefficient of 2.5·10-6 m2/s. See Fig. 2 for color code.


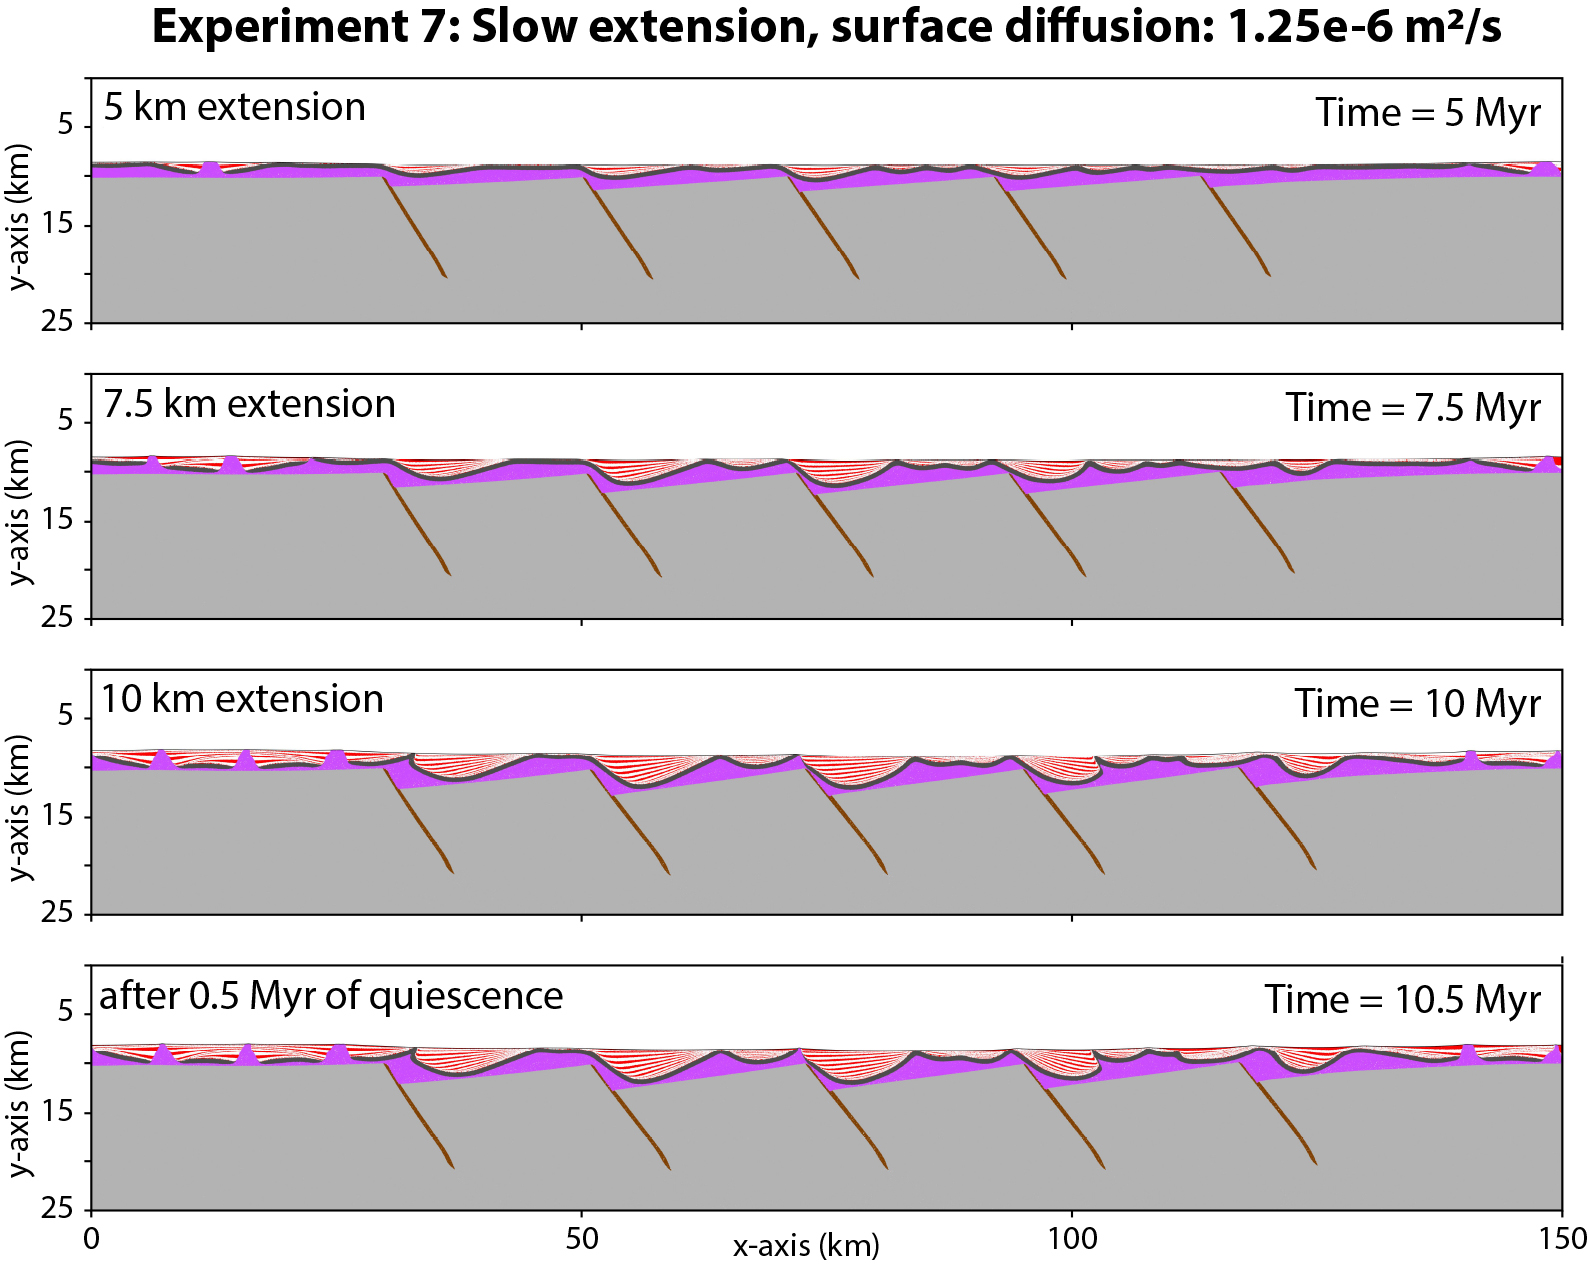


**Figure S3.** Marker composition of thick-skinned extension and tectonic quiescence with a linear viscous salt rheology, a slow extension rate = 1 mm/yr, and a surface diffusion coefficient of 1.25·10-6 m2/s. See Fig. 2 for color code.
